# Supplementary material
Source: PubMed Central journal article supplement (PMC6561467)
Supplement: NIHMS1026843-supplement-1.pdf [file NIHMS1026843-supplement-1.pdf]

Supplementary fig. 1

A

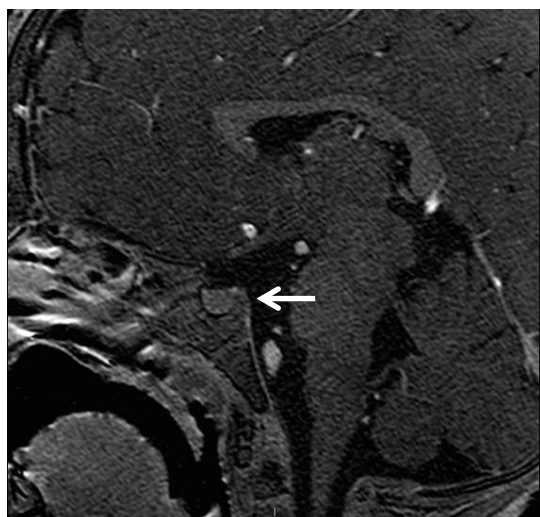

B

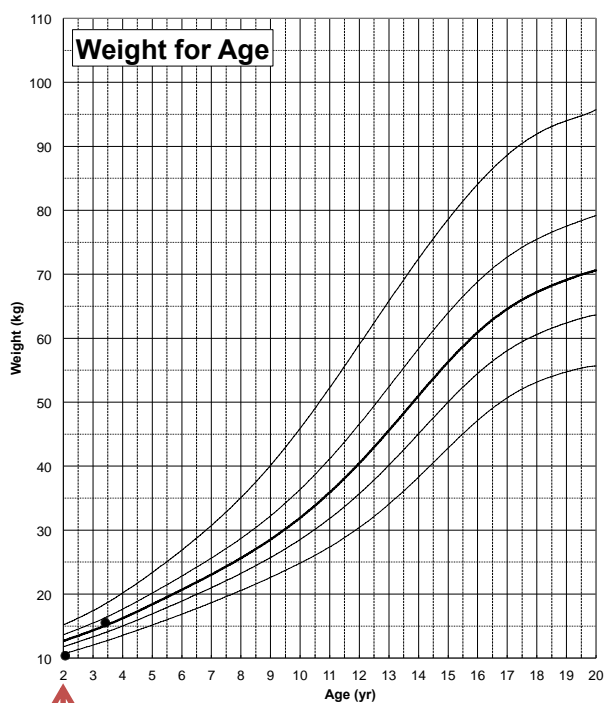

Developed by Ernest M. Post, MD and Zimi Medical Technologies, LLC from CDC data on <http://www.cdc.gov/growthcharts/>

C

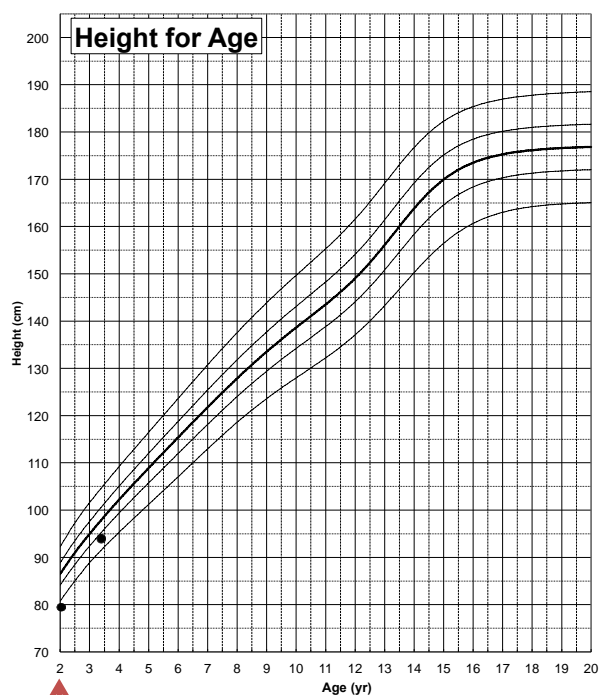

Developed by Ernest M. Post, MD and Zimi Medical Technologies, LLC from CDC data on <http://www.cdc.gov/growthcharts/>

Supplementary figure 1. Clinical data of the proband (II-4). A. Post-contrast T1-weighted pituitary; arrow indicates position of pituitary. B. Weight chart and C. Growth chart. Red arrow indicates the start of DDAVP therapy.
